# Supplementary material
Source: Research Square preprint supplement (doi:10.21203/rs.3.rs-10196893/v1)
Supplement: Supplementary file 1 [file 0ac685c2c1e90ce9030c5a31.docx]

**10. Appendix A: Training Hyperparameters**

| **Parameter** | **Value** |
| --- | --- |
| Epochs | 3 |
| Learning Rate | 5e-5 |
| LoRA Rank | 16 |
| LoRA Alpha | 32 |
| Batch Size | 4 |
| Gradient Accumulation | 4 |
| Precision | BF16 |

**11. Appendix B: Tables**

**Table 1. Dataset Construction and Data Splitting Strategy**

| **Stage** | **Number of Records** | **Percentage (%)** | **Description** |
| --- | --- | --- | --- |
| Raw ClinVar Records | 20,000 | 100 | Initial records downloaded from ClinVar |
| Duplicate  Removal | 19,600 | 98.0 | Unique variants after filtering |

| **Stage** | **Number of Records** | **Percentage (%)** | **Description** |
| --- | --- | --- | --- |
| Training Set | 16,000 | 80.0 | Used for parameter optimization |
| Validation Set | 2,000 | 10.0 | Used for monitoring convergence |
| Held-out Test Set | 2,000 | 10.0 | Reserved for future evaluation |

**Table 2. BioGPT Fine-Tuning Hyperparameters**

| **Hyperparameter** | **Value** |
| --- | --- |
| Base Model | BioGPT (150M) |
| Fine-tuning Strategy | LoRA |
| LoRA Rank (r) | 16 |
| LoRA Alpha | 32 |
| Number of Epochs | 3 |
| Learning Rate | 5 × 10⁵⁵ |
| Optimizer | AdamW |
| Weight Decay | 0.01 |
| Batch Size | 4 |
| Gradient Accumulation | 4 |
| Effective Batch Size | 16 |
| Precision | BF16 |
| Hardware | NVIDIA Tesla T4 |
| Framework | Hugging Face Transformers |

**Table 3. Optimization Performance During Fine-Tuning**

| **Metric** | **Initial Value** | **Final Value** | **Relative Change** |
| --- | --- | --- | --- |
| Training Loss | 1.49 | 1.39 | −6.7% |
| Validation Loss | 1.45 | 1.40 | −3.4% |
| Generalization Gap | 0.04 | 0.01 | Reduced |

**Table 4. Interpretation of Optimization Behavior**

| **Observation** | **Interpretation** |
| --- | --- |
| Decreasing training loss | Successful task adaptation |
| Decreasing validation loss | Improved generalization |

| **Observation** | **Interpretation** |
| --- | --- |
| Small loss gap | Limited overfitting |
| Stable convergence | Optimization stability |
| Similar final losses | Robust parameter adaptation |

**Table 5. Computational Efficiency of LoRA Fine-Tuning**

| **Characteristic** | **Full Fine-Tuning** | **LoRA Fine-Tuning** |
| --- | --- | --- |
| Updated Parameters | 100% | ~0.4% |
| GPU Memory Usage | High | Low |
| Training Cost | High | Low |
| Hardware Requirement | Multi-GPU | Single T4 GPU |
| Reproducibility | Moderate | High |

**Table 6. Study Limitations**

| **Limitation** | **Potential Impact** |
| --- | --- |
| Moderate dataset size | Reduced generalizability |
| Limited variant classes | Restricted biological diversity |
| Absence of external test set | Limited quantitative validation |
| Lack of explainability module | Reduced interpretability |
| No evidence retrieval system | Missing supporting literature |

**Table 7. Future Research Directions**

| **Direction** | **Expected Benefit** |
| --- | --- |
| Larger ClinVar datasets | Improved generalization |
| External benchmark datasets | Robust evaluation |
| Retrieval-Augmented Generation | Evidence-based interpretation |
| Multi-agent architectures | Autonomous reasoning |
| Explainable AI methods | Increased interpretability |
| Clinical validation studies | Real-world applicability |

**Table 8. Key Contributions of the Present Study**

| **Contribution** | **Description** |
| --- | --- |
| Open-source pipeline | Fully reproducible workflow |
| Parameter-efficient adaptation | LoRA-based fine-tuning |

| **Contribution** | **Description** |
| --- | --- |
| Public model release | Hugging Face deployment |
| Low-cost training | Single T4 GPU |
| Biomedical LLM adaptation | Genomic variant interpretation |
| Independent research implementation | Accessible AI genomics research |
